# Supplementary material for: Associations of lifestyle activities and a heathy diet with frailty in old age: a community-based study in Singapore
Source: publisher site journal article supplement (doi:10.18632/aging.102615), 2020-01-02
Supplement: Supplementary file [file aging-v12i1-102615-supplementary-material-SD1.pdf]

## SUPPLEMENTARY TABLES

**Supplementary Table 1. Association of lifestyle activities and healthy diet score with the presence of non-robust status.**

|                                       | N   | Crude OR<br>(95%CI) | <i>p</i> | Adjusted OR*<br>(95%CI) | <i>p</i> |
|---------------------------------------|-----|---------------------|----------|-------------------------|----------|
| Social activities in midlife          |     |                     |          |                         |          |
| Never                                 | 323 | 1                   |          | 1                       |          |
| Irregular                             | 464 | 0.73 (0.54-0.97)    | 0.034    | 0.78 (0.57-1.05)        | 0.112    |
| Daily                                 | 103 | 0.64 (0.41-1.00)    | 0.053    | 0.59 (0.36-0.94)        | 0.028    |
| Social activities in late-life        |     |                     |          |                         |          |
| Never                                 | 183 | 1                   |          | 1                       |          |
| Irregular                             | 597 | 0.48 (0.34-0.69)    | <0.001   | 0.44 (0.30-0.64)        | <0.001   |
| daily                                 | 114 | 0.33 (0.20-0.55)    | <0.001   | 0.26 (0.15-0.43)        | <0.001   |
| Intellectual activities in midlife    |     |                     |          |                         |          |
| Never                                 | 350 | 1                   |          | 1                       |          |
| Irregular                             | 225 | 0.65 (0.46-0.91)    | 0.013    | 0.59 (0.41-0.85)        | 0.005    |
| daily                                 | 310 | 0.57 (0.42-0.78)    | 0.001    | 0.61 (0.43-0.85)        | 0.004    |
| Intellectual activities in late-life  |     |                     |          |                         |          |
| Never                                 | 305 | 1                   |          | 1                       |          |
| irregular                             | 259 | 0.57 (0.40-0.80)    | 0.001    | 0.56 (0.39-0.80)        | 0.001    |
| daily                                 | 326 | 0.48 (0.35-0.67)    | <0.001   | 0.53 (0.38-0.75)        | <0.001   |
| Work more than 9 hours in midlife     |     |                     |          |                         |          |
| Never                                 | 350 | 1                   |          | 1                       |          |
| Irregular                             | 257 | 1.06 (0.76-1.46)    | 0.721    | 1.03 (0.73-1.46)        | 0.835    |
| daily                                 | 283 | 1.18 (0.86-1.62)    | 0.303    | 1.16 (0.83-1.63)        | 0.372    |
| Work more than 9 hours in late-life   |     |                     |          |                         |          |
| Never                                 | 823 | 1                   |          | 1                       |          |
| irregular                             | 45  | 0.90 (0.49-1.65)    | 0.749    | 1.06 (0.55-2.02)        | 0.857    |
| daily                                 | 24  | 1.92 (0.79-4.69)    | 0.149    | 2.37 (0.95-5.90)        | 0.063    |
| HDS in midlife per 1 point increase   | -   | 0.93 (0.89-0.98)    | 0.011    | 0.94 (0.90-0.99)        | 0.033    |
| HDS in late-life per 1 point increase | -   | 0.91 (0.86-0.95)    | <0.001   | 0.92 (0.87-0.97)        | 0.003    |

OR was obtained using logistic analysis, depended variable was defined as robust and non-robust (i.e. prefrailty and frailty). N, number of participants; OR, odds ratio; CI, confidence interval; HDS, healthy diet score.

\* Adjusted for age, gender, education level, housing type, marital status, living condition, number of comorbidities (15), and SM-MMSE score.

**Supplementary Table 2. Gender differences in participation in lifestyle activities and the HDS.**

|                                      | <b>Male</b> | <b>Female</b> | <b><i>p</i>*</b> |
|--------------------------------------|-------------|---------------|------------------|
| Social activities in midlife         | 177(68.3)   | 390(61.8)     | 0.066            |
| Social activities in late-life       | 193(74.2)   | 518(81.7)     | 0.012            |
| Intellectual activities in midlife   | 160(62)     | 375(59.8)     | 0.542            |
| Intellectual activities in late-life | 170(65.6)   | 415(65.8)     | 0.97             |
| Work more than 9 hours in midlife    | 198(76.2)   | 342(54.3)     | <0.001           |
| Work more than 9 hours in late-life  | 22(8.5)     | 47(7.4)       | 0.603            |
| HDS in midlife                       | 14.6±3.2    | 14.8±2.7      | 0.351**          |
| HDS in late-life                     | 14.9±3.0    | 15.0±2.6      | 0.375**          |

Participation was defined more than once a month.

HDS, healthy diet score.

\**P*-value obtained using Chi-square test.

\*\* *P*-value obtained using Kruskal Wallis Test.

**Supplementary Table 3. Summary of studies on the prevalence and risk factors of frailty in Singapore.**

| <b>Investigator</b> | <b>Participation (cohort)</b>              | <b>Criteria of frailty (prevalence of frailty, prefrailty)</b> | <b>Factors associated with frailty</b>                                                                                                                                                                                                                                   | <b>Specific chronic diseases associated with frailty</b>                                                                                                                                                                                                     | <b>Factors not associated with frailty</b>                                                     |
|---------------------|--------------------------------------------|----------------------------------------------------------------|--------------------------------------------------------------------------------------------------------------------------------------------------------------------------------------------------------------------------------------------------------------------------|--------------------------------------------------------------------------------------------------------------------------------------------------------------------------------------------------------------------------------------------------------------|------------------------------------------------------------------------------------------------|
| Liang Feng          | 1827 Chinese aged 55 and above (SLAS)      | Fried criteria (2.5%, 32.4%)                                   | age, education level, alcohol, smoking, comorbidity, cognitive impairment, depression, ADL, IADL.                                                                                                                                                                        |                                                                                                                                                                                                                                                              | sex, living alone.                                                                             |
| Tze Pin Ng          | 1685 participants aged 55 and above (SLAS) | Fried criteria (5.3%, 42.3%)                                   | age, education, housing type, ethnicity, living alone, smoking, comorbidity, polypharmacy, cognitive impairment, depression, self-rated health, obesity, high nutritional risk, low albumin, anemia, total cholesterol, white cell count, ALD, IADL, hospital admission. | diabetes, hypertension, cardiovascular disease, coronary heart disease, heart failure, atrial fibrillation, stroke, cataracts/glaucoma, visual impairment, hearing impairment, asthma/COPD, osteoporosis, gastrointestinal problems, chronic kidney disease. | sex, drinking, thyroid disease, arthritis, cancer, orthostatic hypotension, lymphocyte counts. |
| Liang Feng          | 1575 Chinese aged 55 and above (SLAS)      | Fried criteria (2%, 32%)                                       | age, education, smoking, alcohol, comorbidity, cognitive impairment, depression, ADL-IADL, hospitalization in the past 1 year, physical component scale.                                                                                                                 | diabetes, atrial fibrillation, heart failure, cataract and eye disorders, kidney failure, COPD, hip fracture.                                                                                                                                                | sex, hypertension, high cholesterol, heart attack, asthma, arthritis, APOE epsilon4.           |
| Liang Feng          | 2375 Chinese aged 55 and above (SLAS)      | Fried criteria (2.6%, 33.3%)                                   | age, education, smoking, alcohol, comorbidity, cognitive impairment, depression, ADL-IADL disability, physical component score.                                                                                                                                          |                                                                                                                                                                                                                                                              | sex, APOE epsilon4 carrier, hospitalization in the past year.                                  |
| Nigel Teo           | 2406 participants aged 55 and above (SLAS) | Fried criteria (3.4%, 45.1%)                                   | self-defined social frailty (including 7 components: Living alone, no education, absence of a confidant, infrequent contact, infrequent social activities, financial difficulty, socioeconomic deprivation).                                                             |                                                                                                                                                                                                                                                              |                                                                                                |
| Kai Wei             | 5685 participants aged 55 and above (SLAS) | Fried criteria (4.5%, 45.7%)                                   | age, ethnicity, sex, education, housing status, comorbidity, polypharmacy, cognitive impairment,                                                                                                                                                                         | diabetes, hypertension, cardiac disease, stroke, anemia, chronic kidney disease, kidney failure, hearing loss, visual                                                                                                                                        |                                                                                                |

|                         |                                                                                       |                                                          |                                                                                                                                                                    |                                                                                                                                                                                                           |                                                                                                                             |
|-------------------------|---------------------------------------------------------------------------------------|----------------------------------------------------------|--------------------------------------------------------------------------------------------------------------------------------------------------------------------|-----------------------------------------------------------------------------------------------------------------------------------------------------------------------------------------------------------|-----------------------------------------------------------------------------------------------------------------------------|
|                         |                                                                                       |                                                          | depression, ADL/IADL, hospitalization, quality of life, malnutrition.                                                                                              | impairment.                                                                                                                                                                                               |                                                                                                                             |
| Janhavi Ajit Vaingankar | 2101 participants aged 60 years and above (Well-being of the Singapore Elderly study) | Fried criteria (5.7%, 45.1%)                             | age, ethnicity, education, employment status, socioeconomic status, care need, social networks, cognitive impairment, chronic physical condition, hospitalization. | diabetes, hypertension, heart trouble, stroke, transient ischemic attacks, arthritis, visual problems, persistent cough, respiratory problems, stomach or intestinal problems, faints, paralysis, cancer. | sex, marital status, psychological morbidity in caregivers, body mass index, depression, hearing problems, skin conditions. |
| Reshma Merchant         | 1051 participants age 65 years and above (Singapore Population Health Studies cohort) | 5-item FRAIL scale (6.2%, 37%)                           | age, sex, ethnicity, comorbidity, polypharmacy, cognitive impairment, depression, Timed-Up and-Go (TUG) test, grip strength, ADL, IADL, subjective health.         | diabetes, hypertension, hyperlipidemia, heart attack, stroke.                                                                                                                                             | number of falls, cancer.                                                                                                    |
| Lixia Ge                | 721 participants aged 60 and above (longitudinal Population Health Index survey)      | Clinical Frailty Scale (prevalence of frailty was 24.5%) | age, marital status, education, employment, money insufficiency, living alone, smoking, depression.                                                                |                                                                                                                                                                                                           | sex, ethnicity.                                                                                                             |

SLAS, Singapore Longitudinal Ageing Studies; COPD, chronic obstructive pulmonary disease; ADL, activities of daily living; IADL, instrumental activities of daily living.

**Supplementary Table 4. Association between engagement of midlife long working hours and other lifestyle activities.**

|                                 | Midlife long working hour |                     | <i>p</i> |
|---------------------------------|---------------------------|---------------------|----------|
|                                 | Non-engagement<br>N (%)   | Engagement<br>N (%) |          |
| Midlife physical activity       |                           |                     |          |
| Non-engagement                  | 120(34.3)                 | 228(42.3)           | 0.017    |
| Engagement                      | 230(65.7)                 | 311(57.7)           |          |
| Late-life physical activity     |                           |                     |          |
| Non-engagement                  | 49(14.0)                  | 110(20.4)           | 0.015    |
| Engagement                      | 301(86.0)                 | 430(79.6)           |          |
| Midlife social activity         |                           |                     |          |
| Non-engagement                  | 100(28.6)                 | 222(41.4)           | <0.001   |
| Engagement                      | 250(71.4)                 | 314(58.6)           |          |
| Late-life social activity       |                           |                     |          |
| Non-engagement                  | 55(15.7)                  | 128(23.7)           | 0.004    |
| Engagement                      | 295(84.3)                 | 411(76.3)           |          |
| Midlife Intellectual activity   |                           |                     |          |
| Non-engagement                  | 109(31.7)                 | 241(44.9)           | <0.001   |
| Engagement                      | 235(68.3)                 | 296(55.1)           |          |
| Late-life intellectual activity |                           |                     |          |
| Non-engagement                  | 96(27.7)                  | 208(38.6)           | 0.001    |
| Engagement                      | 250(72.3)                 | 331(61.4)           |          |
| Late-life long working hour     |                           |                     |          |
| Non-engagement                  | 334(95.7)                 | 485(90.0)           | 0.002    |
| Engagement                      | 15(4.3)                   | 54(10.0)            |          |

**Supplementary Table 5. Operational definition of healthy diet score; the scoring rules for each of the six components.**

| Dietary item           | Frequency of consumption |                                                      |                    |                    |                   |                  |
|------------------------|--------------------------|------------------------------------------------------|--------------------|--------------------|-------------------|------------------|
|                        | Never or rarely          | More than once per month but less than once per week | 1-3 times per week | 4-6 times per week | 1-2 times per day | >2 times per day |
| Green vegetables       | 0                        | 1                                                    | 2                  | 3                  | 4                 | 5                |
| Fruits                 | 0                        | 1                                                    | 2                  | 3                  | 4                 | 5                |
| Legumes                | 0                        | 1                                                    | 2                  | 3                  | 4                 | 5                |
| Nuts                   | 0                        | 1                                                    | 2                  | 3                  | 4                 | 5                |
| Marine fish            | 0                        | 1                                                    | 2                  | 3                  | 4                 | 5                |
| Meat and meat products | 5                        | 4                                                    | 3                  | 2                  | 1                 | 0                |

**Supplementary Table 6. Association of lifestyle activities and healthy diet score with prefrailty and frailty.**

| Life style activities, yes vs no      | prefrailty           |          |                       |          | frailty              |          |                       |          |
|---------------------------------------|----------------------|----------|-----------------------|----------|----------------------|----------|-----------------------|----------|
|                                       | Adjusted OR* (95%CI) | <i>p</i> | Adjusted OR** (95%CI) | <i>p</i> | Adjusted OR* (95%CI) | <i>p</i> | Adjusted OR** (95%CI) | <i>p</i> |
| Social activities in midlife          | 0.76 (0.56-1.02)     | 0.072    | 0.76 (0.56-1.03)      | 0.086    | 0.55 (0.28-1.09)     | 0.090    | 0.55 (0.27-1.11)      | 0.096    |
| Social activities in late-life        | 0.43 (0.29-0.63)     | <0.001   | 0.44 (0.30-0.65)      | <0.001   | 0.21 (0.10-0.46)     | <0.001   | 0.22 (0.10-0.47)      | <0.001   |
| Intellectual activities in midlife    | 0.60 (0.45-0.81)     | 0.001    | 0.62 (0.46-0.84)      | 0.003    | 0.56 (0.29-1.10)     | 0.098    | 0.53 (0.26-1.08)      | 0.081    |
| Intellectual activities in late-life  | 0.57 (0.42-0.77)     | <0.001   | 0.59 (0.43-0.81)      | 0.001    | 0.35 (0.18-0.69)     | 0.002    | 0.38 (0.19-0.77)      | 0.008    |
| Work more than 9 hours in midlife     | 1.02 (0.76-1.37)     | 0.875    | 0.98 (0.73-1.34)      | 0.944    | 2.96 (1.34-6.57)     | 0.007    | 3.27 (1.44-7.45)      | 0.005    |
| Work more than 9 hours in late-life   | 1.31 (0.76-2.26)     | 0.319    | 1.32 (0.76-2.30)      | 0.321    | 2.94 (0.91-9.53)     | 0.071    | 2.81 (0.85-9.27)      | 0.089    |
| HDS in midlife per 1 point increase   | 0.95 (0.90-1.00)     | 0.074    | 0.95 (0.90-1.01)      | 0.111    | 0.86 (0.77-0.96)     | 0.012    | 0.86 (0.76-0.96)      | 0.013    |
| HDS in late-life per 1 point increase | 0.93 (0.88-0.98)     | 0.008    | 0.93 (0.88-0.98)      | 0.010    | 0.85 (0.75-0.95)     | 0.008    | 0.83 (0.74-0.94)      | 0.004    |

OR, odds ratio; CI, confidence interval; HDS, healthy diet score.

\*Adjusted for age, gender, education level, housing type, marital status, living condition, SM-MMSE score, and number of comorbidities,

\*\*Adjusted for age, gender, education level, housing type, marital status, living condition, SM-MMSE score, and comorbidities (including 15 diseases, using binary indicators of each disease).

**Supplementary Table 7. Correlation matrix of variables.**

|                  | <b>Frailty</b> | <b>Education level</b> | <b>Housing type</b> | <b>Marital status</b> | <b>Living condition</b> | <b>Comorbidities</b> | <b>SM-MMSE</b> |
|------------------|----------------|------------------------|---------------------|-----------------------|-------------------------|----------------------|----------------|
| Frailty          | 1              |                        |                     |                       |                         |                      |                |
| Education level  | -0.142         | 1                      |                     |                       |                         |                      |                |
| Housing type     | -0.134         | 0.135                  | 1                   |                       |                         |                      |                |
| Marital status   | -0.082         | 0.150                  | 0.219               | 1                     |                         |                      |                |
| Living condition | 0.037          | -0.120                 | 0.098               | -0.513                | 1                       |                      |                |
| Comorbidities    | 0.083          | -0.057                 | -0.042              | -0.043                | 0.000                   | 1                    |                |
| SM-MMSE score    | -0.083         | 0.482                  | 0.078               | 0.099                 | -0.129                  | -0.169*              | 1              |

Comorbidities means the number of 15 specific comorbidities.

SM-MMSE means score of SM-MMSE.

Shown are spearman correlation coefficients unless stated otherwise.

\* Pearson correlation coefficient.

**Supplementary Table 8. Comorbidity-stratified association of lifestyle activities and healthy-diet pattern score with the presence of non-robust status.**

| <b>Life style activities, yes vs no</b> | <b>No comorbidity</b>       |                 | <b>Comorbidity</b>          |                 |
|-----------------------------------------|-----------------------------|-----------------|-----------------------------|-----------------|
|                                         | <b>Adjusted OR* (95%CI)</b> | <b><i>p</i></b> | <b>Adjusted OR* (95%CI)</b> | <b><i>p</i></b> |
| Social activities in midlife            | 1.16 (0.71-1.89)            | 0.545           | 0.55 (0.38-0.81)            | 0.002           |
| Social activities in late-life          | 0.38(0.21-0.68)             | 0.001           | 0.40 (0.24-0.66)            | <0.001          |
| Intellectual activities in midlife      | 0.83 (0.51-1.34)            | 0.449           | 0.49 (0.34-0.72)            | <0.001          |
| Intellectual activities in late-life    | 0.50 (0.30-0.82)            | 0.007           | 0.58 (0.40-0.85)            | 0.006           |
| Work more than 9 hours in midlife       | 0.97 (0.59-1.59)            | 0.918           | 1.12 (0.77-1.62)            | 0.532           |
| Work more than 9 hours in late-life     | 1.03 (0.50-2.08)            | 0.933           | 2.13 (0.88-5.13)            | 0.092           |

OR was obtained using logistic analysis, depended variable was defined as robust and non-robust (i.e. prefrailty/frailty).

No comorbidity means the sum of comorbidity is less than 2.

Comorbidity means the sum of comorbidity is equal or more than 2.

\* Adjusted for age, sex, education level, housing type, marry status, living condition, SM-MMSE score.
